# Supplementary material for: Effects of inorganic additives on polymorphs of glycine in microdroplets
Source: Royal Society of Chemistry journal article supplement (doi:10.1039/c7ce01942d), 2017-11-21
Supplement: c7ce01942d1.pdf [file c7ce01942d1.pdf]

## Supplementary Material

### Effects of inorganic additives on polymorphs of glycine in microdroplets

Li Ding, Shanghong Zong, Leping Dang\*, Zhanzhong Wang\*, Hongyuan Wei

School of Chemical Engineering and Technology, Tianjin University, Tianjin 300072, P.R. China

**Table 2** Relationship of metastable zone width and polymorphs

| Dissolved temperature(°C) | Metastable zone width(°C) |          |                 |                 |          |
|---------------------------|---------------------------|----------|-----------------|-----------------|----------|
| 30                        | 15.0                      | 13.0     | 11.0            | 10              | 8.8      |
| 35                        | 13.0                      | 11.3     | 9.5             | 7.9             | 7.0      |
| 40                        | 11.3                      | 9.7      | 8.8             | 7.0             | 6.0      |
| 45                        | 10.0                      | 8.5      | 7.9             | 6.0             | 4.5      |
| Polymorphic outcome       | $\alpha$                  | $\alpha$ | $\alpha+\gamma$ | $\alpha+\gamma$ | $\gamma$ |
| NaCl concentration        | 0%                        | 2%       | 4%              | 6%              | 8%       |

**Table 3** Nucleation parameters of different polymorphs

| NaCl | S=C/C* | $\tau/s$ | $\Delta G_v(10^6J/m^3)$ | $\Delta G^*(10^{-24}J)$ | $r^*(nm)$ | $i^*$   |
|------|--------|----------|-------------------------|-------------------------|-----------|---------|
| 0%   | 1.1    | 900      | -3.6499                 | 73.37108                | 2.12527   | 3.68873 |
|      | 1.2    | 512      | -6.9821                 | 20.05001                | 1.111     | 0.52694 |
|      | 1.3    | 247      | -10.0473                | 9.68251                 | 0.77206   | 0.17684 |
|      | 1.4    | 144      | -12.8854                | 5.88696                 | 0.60201   | 0.08384 |
|      | 1.5    | 79       | -15.5275                | 4.054                   | 0.49957   | 0.04791 |
|      | 1.6    | 44       | -17.999                 | 3.0171                  | 0.43098   | 0.03076 |
| 2%   | 1.1    | 547      | -3.6499                 | 72.54679                | 2.1174    | 3.64729 |
|      | 1.2    | 348      | -6.9821                 | 19.82476                | 1.10689   | 0.52102 |

|    |     |     |          |          |         |         |
|----|-----|-----|----------|----------|---------|---------|
|    | 1.3 | 218 | -10.0473 | 9.57373  | 0.76919 | 0.17485 |
|    | 1.4 | 123 | -12.8854 | 5.82082  | 0.59978 | 0.08289 |
|    | 1.5 | 72  | -15.5275 | 4.00846  | 0.49772 | 0.04737 |
|    | 1.6 | 39  | -17.999  | 2.98321  | 0.42938 | 0.03041 |
|    | 1.1 | 411 | -3.6499  | 71.74882 | 2.10953 | 3.60717 |
|    | 1.2 | 277 | -6.9821  | 19.6067  | 1.10278 | 0.51529 |
| 4% | 1.3 | 183 | -10.0473 | 9.46843  | 0.76634 | 0.17293 |
|    | 1.4 | 97  | -12.8854 | 5.7568   | 0.59755 | 0.08198 |
|    | 1.5 | 56  | -15.5275 | 3.96436  | 0.49585 | 0.04685 |
|    | 1.6 | 35  | -17.999  | 2.95039  | 0.42778 | 0.03008 |
|    | 1.1 | 340 | -3.6499  | 59.78513 | 1.9851  | 3.00569 |
|    | 1.2 | 205 | -6.9821  | 16.3374  | 1.03773 | 0.42937 |
| 6% | 1.3 | 129 | -10.0473 | 7.88962  | 0.72113 | 0.14409 |
|    | 1.4 | 77  | -12.8854 | 4.79688  | 0.56231 | 0.06831 |
|    | 1.5 | 47  | -15.5275 | 3.30333  | 0.46662 | 0.03904 |
|    | 1.6 | 33  | -17.999  | 2.45843  | 0.40255 | 0.02506 |
|    | 1.1 | 298 | -3.6499  | 58.94254 | 1.97576 | 2.96333 |
|    | 1.2 | 168 | -6.9821  | 16.10715 | 1.03285 | 0.42332 |
| 8% | 1.3 | 103 | -10.0473 | 7.77843  | 0.71774 | 0.14206 |
|    | 1.4 | 65  | -12.8854 | 4.72928  | 0.55966 | 0.06735 |
|    | 1.5 | 38  | -15.5275 | 3.25677  | 0.46443 | 0.03849 |
|    | 1.6 | 27  | -17.999  | 2.42378  | 0.40066 | 0.02471 |
